# Supplementary material
Source: PubMed Central journal article supplement (PMC8661404)
Supplement: ocaa346_supplementary_data.pdf [file ocaa346_supplementary_data.pdf]

## Supplementary Material

### *Architectural Design and Training of DPN-SA*

A deep stacked sparse autoencoder consists of multiple encoders and decoders to learn the identity function of the feature vectors, stacked to each other, with the setup of sparsity constraints in the hidden layers, whose neurons can be activated or not depending on the input.[1]

Let  $\mathbf{X} = \{\mathbf{x}(1), \mathbf{x}(2), \dots, \mathbf{x}(N)\}$  represent the population of  $\mathbf{x}(i)$  individuals. Each  $\mathbf{x}(i) \in \mathbf{R}^d$  is a  $d$ -dimensional vector, where  $d$  represents the number of pre-treatment covariates, i.e. the number of features. The DPN-SA uses up to  $l$  encoder and  $l$  decoder layers stacked together one after the other, with an additional linear layer at the end of the last decoder. The activation function of each encoder and decoder is the hyperbolic tangent layer *tanh*. As  $\mathbf{x}(i) \in \mathbf{R}^d$ , the reconstructed output also needs to be  $\mathbf{x}'(i) \in \mathbf{R}^d$ . Supposing we set  $l = 2$ , the sample input covariate vector  $\mathbf{x}(i)$  is reconstructed in the forward propagation as follows:

$$e^{(1)}(i) = f(W^{(1)}x(i) + b^{(1)}) \quad (1)$$

$$e^{(2)}(i) = f(W^{(2)}e^{(1)}(i) + b^{(2)}) \quad (2)$$

$$d^{(1)}(i) = f(W^{(2)T}e^{(2)}(i) + b^{(3)}) \quad (3)$$

$$d^{(2)}(i) = f(W^{(1)T}d^{(1)}(i) + b^{(4)}) \quad (4)$$

$$x'(i) = W^{(3)}d^{(2)}(i) + b^{(5)} \quad (5)$$

where:  $e^{(l)}(i)$ ,  $d^{(l)}(i)$ ,  $x'(i)$  are the activations of the encoder, decoder and the reconstructed input of  $l^{th}$  layer for the  $i^{th}$  sample, respectively;  $W^{(1)}$  and  $W^{(2)}$  are the weight matrices of encoder 1 and encoder 2, having sizes  $s1 \times d$  and  $s2 \times s1$ ;  $W^{(2)T}$  and  $W^{(1)T}$  are the weight matrices of decoder 1 and decoder 2, having sizes  $s1 \times s2$  and  $d \times s1$ ;  $s(l)$  denotes size or number of neurons of  $l^{th}$  layer;  $b^{(1)}$ ,  $b^{(2)}$ ,  $b^{(3)}$ ,  $b^{(4)}$  are

the biases of encoder layer 1 and 2 and decoder layer 1 and 2 respectively and  $f(\cdot)$  is the activation function ( $\tanh$ ).

After reconstructing the a sample input feature  $\mathbf{x}(i)$ , the objective function of the sparse autoencoder  $J_{sparse}(\mathbf{W}, \mathbf{b})$  has to be minimized:

$$J(\mathbf{W}, \mathbf{b}) = \left[ \frac{1}{2N} \sum_{i=1}^N |x'_{\mathbf{W}, \mathbf{b}}(i) - x(i)|^2 \right] + \frac{\lambda}{2N} \sum_{l=1}^L \|\mathbf{W}^{(l)}\|_F^2 \quad (6)$$

$$J_{sparse}(\mathbf{W}, \mathbf{b}) = J(\mathbf{W}, \mathbf{b}) + \beta \sum_{j=1}^{s_2} \text{KL}(\rho || \rho_j) \quad (7)$$

where  $\lambda$  is the regularization parameter,  $\mathbf{W}^{(l)}$  is the weight matrix corresponding to  $l^{\text{th}}$  layer of the network,  $s_2$  is the number of neurons in the  $2^{\text{nd}}$  hidden layer,  $\beta$  is the weight of the sparsity penalty,  $\text{KL}$  is the Kullback-Leibler divergence,  $\rho$  is the sparsity constraint or sparsity parameter and  $\rho_j$  is the average activation of layer 2 (with  $s_2$  neurons), and the subscript  $F$  is the Frobenius norm (equivalent to the squared norm of the weight matrix). The  $J_{sparse}(\mathbf{W}, \mathbf{b})$  is minimized using backpropagation, for  $K_{sa}$  number of epochs.

The DPN-SA is trained in two phases. In the first phase the sparse autoencoder is trained and optimized ( $K_{sa}$  epochs). The parameters  $(\mathbf{W}, \mathbf{b})$  are updated in each iteration by the Adam optimizer. The Adam is an optimization algorithm for stochastic gradient descent designed for training deep learning models.[2] After the sparse autoencoder has learnt the latent representation of the covariates, the decoder part is removed and a softmax classifier is attached to the end of the last encoder layer. The softmax classifier is trained for  $K_c$  number of epochs. The final network gives the estimation of the propensity score  $\boldsymbol{\pi}(\mathbf{x})$ . Algorithm 1 describes the two-phase procedures to obtain the final DPN-SA.

---

**Algorithm 1.** Training of the Deep Propensity Network using a Sparse Autoencoder (DPN-SA)

---

**Input:** Dataset batches  $B_b$  of random samples with assigned treatment  $T$  training set  $X_{train}$ , number of epochs  $K_s, K_c$ , learning rates  $lr_{SA}, lr_c$  for the sparse autoencoder and the *softmax* classifier, respectively.

**Output:** Propensity Scores  $PS_{out}$  for each sample  $i = 1 \dots N$ .

- 1: **Procedure:**
  - 2: Initialize the weights  $W^{(l)}, b^{(l)}$  of the sparse autoencoder.
  - 3: **for** iteration epochs = 1, 2, . . .  $K_s$  **do**
  - 4: **for** dataset batches = 1, 2, . . .  $B$  in  $X_{batch}$
  - 5:       Compute  $x'_{batch}$  using forward propagation algorithm.
  - 6:       Compute  $J_{sparse}$ .
  - 7:       Compute Gradient:  $\nabla(J_{sparse})$
  - 8:       Optimize weights using Adam optimizer:  $(W^{(l)}, b^{(l)}) \leftarrow Adam(X_{batch}, W^{(l)}, b^{(l)})$
  - 9:     **end for**
  - 10: **end for**
  - 11: Remove the decoder from the sparse autoencoder
  - 12: Attach a *softmax* classifier to the last encoder
  - 13: Initialize  $W^{(c)}, b^{(c)}$  of the classifier
  - 14:  $PS_{out} \leftarrow$  Empty
  - 15: **for** iteration epochs = 1, 2, . . .  $K_c$  **do**
  - 16: **for** dataset batches = 1, 2, . . .  $B$  in  $X_{batch}$
  - 17:      $(W^{(l)}, b^{(l)}, W^{(c)}, b^{(c)}) \leftarrow Adam(X_{batch}, W^{(l)}, b^{(l)}, W^{(c)}, b^{(c)})$
  - 18:     Get the propensity score  $\pi(T | X_{batch})$  and add to  $PS_{out}$
  - 19:     **end for**
  - 20: **end for**
- 

### *Detailed characteristics of the sample population*

**Table S1.** The original IHDP dataset ([https://github.com/vdorie/npci/tree/master/examples/ihdp\\_sim](https://github.com/vdorie/npci/tree/master/examples/ihdp_sim)).

| Variable  | All patients (985)                   | T=1<br>(377; 38.2%)                  | T=0<br>(608; 61.8%)              |
|-----------|--------------------------------------|--------------------------------------|----------------------------------|
| bw        | Avg = 1795.86701<br>Std = 457.219401 | Avg = 1819.32361<br>Std = 438.809313 | Avg = 1781.32361<br>Std = 468.76 |
| b.head    | Avg = 29.4277563<br>Std = 2.46631306 | Avg = 29.4677563<br>Std = 2.32608452 | Avg = 29.04<br>Std = 2.55        |
| preterm   | Avg = 6.98172589<br>Std = 2.67927742 | Avg = 6.95755968<br>Std = 2.52188345 | Avg = 6.996<br>Std = 2.77        |
| Birth.o   | Avg = 1.8964467<br>Std = 0.998697    | Avg = 1.90185676<br>Std = 1.03831991 | Avg = 1.896<br>Std = 0.97        |
| mn.health | Avg = 99.9949239<br>Std = 15.8785717 | Avg = 100.657825<br>Std = 15.9741196 | Avg = 99.58<br>Std = 15.88       |

|            | Avg = 24.7715736<br>Std = 6.0335 | Avg = 24.5862069<br>Std = 5.93211784 | Avg = 24.88<br>Std = 6.09 |
|------------|----------------------------------|--------------------------------------|---------------------------|
| momage     |                                  |                                      |                           |
| Sex - male | 499 (50.6%)                      | 187(49.6%)                           | 312(51.3%)                |
| twin       | 97(9.84%)                        | 39(10.34%)                           | 58(9.5%)                  |
| b.marr     | 455(46.19%)                      | 160(42.44%)                          | 295(48.5%)                |
| Mom.lths   | 394(40%)                         | 162(42.99%)                          | 232(38.1%)                |
| Mom.hs     | 270(27.4%)                       | 104(27.6%)                           | 166(27.3%)                |
| Mom.scoll  | 197(20%)                         | 63(16.7%)                            | 134(22.03%)               |
| cig        | 346(35.1%)                       | 131(34.7%)                           | 215(35.5%)                |
| first      | 542(55.02%)                      | 177(46.9%)                           | 365(60.1%)                |
| booze      | 128(12.9%)                       | 43(11.4%)                            | 85(13.07%)                |
| drugs      | 947(96.14%)                      | 360(95.4%)                           | 587(96.2%)                |
| work.dur   | 566(57.5%)                       | 218(57.8%)                           | 348(57.8%)                |
| prenatal   | 940(95.43%)                      | 358(94.9%)                           | 582(95.8%)                |
| ark        | 128(12.99%)                      | 48(12.7%)                            | 80(13.19%)                |
| ein        | 138(14.01%)                      | 46(12.2%)                            | 92(14.8%)                 |
| har        | 138(14.01%)                      | 45(11.93%)                           | 93(15.23%)                |
| mia        | 100(10.15%)                      | 44(11.67%)                           | 56(9.29%)                 |
| pen        | 101(10.25%)                      | 48(12.73%)                           | 53(8.71%)                 |
| tex        | 137(13.9%)                       | 49(12.99%)                           | 88(14.38%)                |
| was        | 131(13.29%)                      | 51(13.5%)                            | 80(13.1%)                 |
| momwhite   | 363(36.85%)                      | 139(36.8%)                           | 224(36.8%)                |
| momblack   | 517(52.48%)                      | 201(53.31%)                          | 316(51.9%)                |
| momhisp    | 105(10.65%)                      | 31(8.2%)                             | 74(12.1%)                 |

**Table S2.** The processed IHDP dataset (<https://www.fredjo.com/>).

| Variable | All patients (747)            | T=1<br>(139; 18.6%)           | T=0<br>(608; 81.3%)                |
|----------|-------------------------------|-------------------------------|------------------------------------|
| X1       | Avg = -1.20482E-11<br>Std = 1 | Avg = -1.20482E-11<br>Std = 1 | Avg = -1.20482E-11<br>Std = 468.76 |
| X2       | Avg = -2.12851E-10<br>Std = 1 | Avg = -2.12851E-10<br>Std = 1 | Avg = -2.12851E-10<br>Std = 1      |
| X3       | Avg = -2.74431E-10<br>Std = 1 | Avg = -2.74431E-10<br>Std = 1 | Avg = -2.74431E-10<br>Std = 1      |
| X4       | Avg = -8.03258E-12<br>Std = 1 | Avg = -8.03258E-12<br>Std = 1 | Avg = -8.03258E-12<br>Std = 1      |
| X5       | Avg = 2.67738E-11<br>Std = 1  | Avg = 2.67738E-11<br>Std = 1  | Avg = 2.67738E-11<br>Std = 1       |
| X6       | Avg = 1.20482E-11<br>Std = 1  | Avg = 1.20482E-11<br>Std = 1  | Avg = 1.20482E-11<br>Std = 1       |
| X7       | 384 (51.4%)                   | 72(51.7%)                     | 212(34.8%)                         |
| X8       | 70(9.37%)                     | 12(8.6%)                      | 58(9.5%)                           |
| X9       | 389(52.07%)                   | 94(57.6%)                     | 295(48.51)                         |
| X10      | 272(36.4%)                    | 40(28.7%)                     | 232(38.15%)                        |
| X11      | 201(26.9%)                    | 35(25.1%)                     | 166(27.3%)                         |
| X12      | 164(21.9%)                    | 30(21.5%)                     | 134(22.03)                         |
| X13      | 268 (35.8%)                   | 53(38.1%)                     | 215(35.36%)                        |
| X14      | 346(46.8%)                    | 80(57.5%)                     | 266(43.75%)                        |
| X15      | 105(14.05%)                   | 20(14.3%)                     | 85(13.98%)                         |
| X16      | 717(95.9%)                    | 130(9.3%)                     | 587(96.5%)                         |
| X17      | 444(59.4%)                    | 96(69.06%)                    | 348(57.2%)                         |

|     |             |            |             |
|-----|-------------|------------|-------------|
| X18 | 720(96.3%)  | 138(99.2%) | 582(95.72%) |
| X19 | 101(13.5%)  | 21(15.1%)  | 80(13.15%)  |
| X20 | 101(13.5%)  | 9(6.47%)   | 92(15.13%)  |
| X21 | 117(15.55%) | 24(17.2%)  | 93(15.29%)  |
| X22 | 61(8.1%)    | 5(3.5%)    | 56(9.21%)   |
| X23 | 55(7.36%)   | 2(1.4%)    | 53(8.71%)   |
| X24 | 96(12.8%)   | 8(5.75%)   | 88(14.47%)  |
| X25 | 118(15.7%)  | 38(27.33%) | 80(13.15%)  |

**Table S3.** The original Jobs dataset (<https://users.nber.org/~rdehejia/data/.nswdata2.html>;

<https://www.sciencedirect.com/science/article/abs/pii/S030440760400082X>).

| Variable                            | LaLonde                       | PSID Sample   |
|-------------------------------------|-------------------------------|---------------|
| Age                                 | 24.52(6.63)                   | 34.85(10.44)  |
| Education                           | 10.27(1.7)                    | 12.12(3.08)   |
| Black                               | 0.8(0.40)                     | 0.25(0.43)    |
| Hispanic                            | 0.11(0.31)                    | 0.03(0.18)    |
| Married                             | 0.16(0.37)                    | 0.47(0.34)    |
| No H.S Degree                       | 0.48(0.41)                    | 0.31(0.46)    |
| Real Earnings in 1974               | 3631(6221)                    | 19429(13407)  |
| Real Earnings in 1975               | 3043(5066)                    | 19063(13597)  |
| Real Earnings in 1978               | 5455(6253)                    | 21554(15555)  |
| Real Earnings in 1979               | ...                           | ...           |
| Zero Earnings in 1974               | 0.45(0.5)                     | 0.09(0.28)    |
| Zero Earnings in 1975               | 0.4 (0.49)                    | 0.1(0.3)      |
| Experimental Impact (1978 earnings) | 886(488)                      | ...           |
| Sample size                         | 297 Treatment<br>425 Controls | 2490 Controls |

**Table S4.** The processed Jobs dataset (<https://www.fredjo.com/>).

| Variable | All patients (3212)                    | T=1<br>(297; 9.24%)                    | T=0<br>(2915; 90.75%)                     |
|----------|----------------------------------------|----------------------------------------|-------------------------------------------|
| X1       | Avg = 0.00012765<br>Std = 0.999874618  | Avg = 0.000127646<br>Std = 0.999874618 | Avg = 0.000127646<br>Std = 0.999874618    |
| X2       | Avg = -0.00099<br>Std = 0.999166151    | Avg = -0.00099004<br>Std = 0.999166151 | Avg = -0.00099004<br>Std = 0.999166151    |
| X3       | 1202(37.4%)                            | 238(80.1%)                             | 964(33.03%)                               |
| X4       | 157(4.8%)                              | 28(9.42%)                              | 129(4.4%)                                 |
| X5       | 2274(70.7%)                            | 50(16.8%)                              | 2224(76.2%)                               |
| X6       | 1323(41.1%)                            | 217(73.06%)                            | 1106(37.9%)                               |
| X7       | Avg = -0.0004172<br>Std = 1.000487399  | Avg = -0.00041719<br>Std = 1.000487399 | Avg = -0.00041719<br>Std-dev =1.000487399 |
| X8       | Avg = 3.11333E-06<br>Std = 0.999783331 | Avg =3.11333E-06<br>Std = 0.999783331  | Avg =3.11333E-06<br>Std-dev =0.999783331  |
| X9       | Avg = -0.00047945<br>Std = 1.000054882 | Avg =-0.00047945<br>Std = 1.000054882  | Avg =-0.00047945<br>Std = 1.000054882     |
| X10      | Avg = -0.00033313                      | Avg =-0.00033313                       | Avg =-0.00033313                          |

|     |                                        |                                       |                                       |
|-----|----------------------------------------|---------------------------------------|---------------------------------------|
|     | Std = 1.00047291                       | Std = 1.00047291                      | Std = 1.00047291                      |
| X11 | Avg = 0.001099004<br>Std = 0.999417803 | Avg =0.001099004<br>Std = 0.999417803 | Avg =0.001099004<br>Std = 0.999417803 |
| X12 | Avg = -0.00014633<br>Std = 1.000062289 | Avg =-0.00014633<br>Std = 1.000062289 | Avg =-0.00014633<br>Std = 1.000062289 |
| X13 | Avg = 0.000298879<br>Std = 1.000276622 | Avg =0.000298879<br>Std = 1.000276622 | Avg =0.000298879<br>Std = 1.000276622 |
| X14 | 542(16.8%)                             | 131(44.1%)                            | 411(14.09%)                           |
| X15 | 538(16.74)                             | 111(37.37%)                           | 427(14.6%)                            |
| X16 | Avg =0.00011208<br>Std = 0.99999744    | Avg =0.00011208<br>Std = 0.99999744   | Avg =0.00011208<br>Std = 0.99999744   |
| X17 | 35(1.08%)                              | 6(2.02%)                              | 29(0.99%)                             |

### Supplementary References

1. Ng A. CS294A Lecture notes Sparse autoencoder.

[https://web.stanford.edu/class/cs294a/sparseAutoencoder\\_2011new.pdf](https://web.stanford.edu/class/cs294a/sparseAutoencoder_2011new.pdf)

2. Kingma DP, Ba JL. Adam: A method for stochastic optimization. In: 3rd International Conference on Learning Representations, ICLR 2015 - Conference Track Proceedings. 2015.
